# Supplementary material for: The Genealogic Tree of Mycobacteria Reveals a Long-Standing Sympatric Life into Free-Living Protozoa
Source: PubMed Central journal article supplement (PMC3325273; doi:10.1371/journal.pone.0034754), 2012-04-12

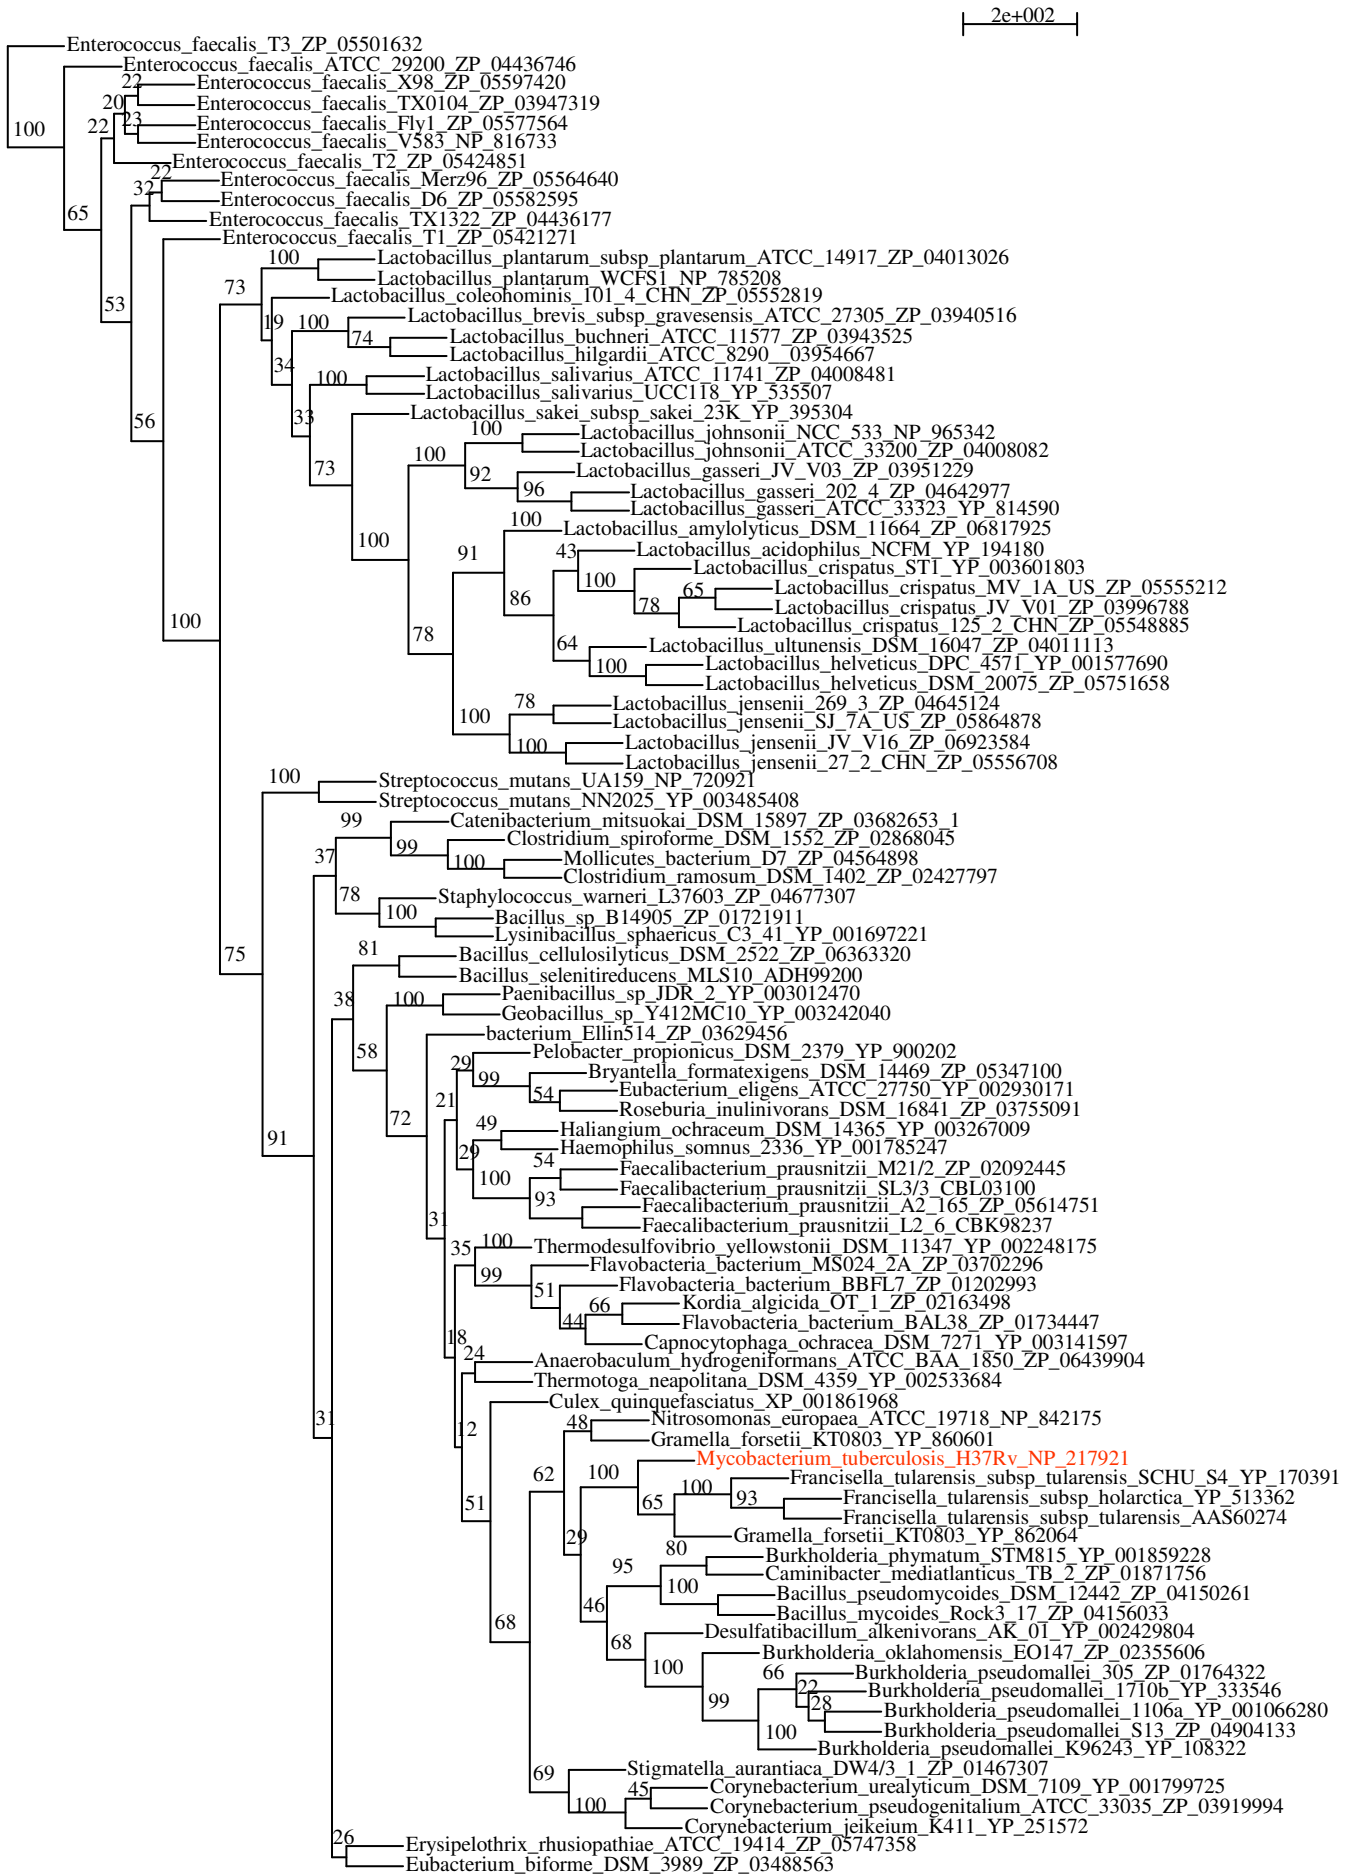

Supplement: pone.0034754.s003.pdf [file pone.0034754.s003.pdf]
